# Supplementary material for: Exploring scenarios of chikungunya mitigation with a data-driven agent-based model of the 2014–2016 outbreak in Colombia
Source: PubMed Central journal article supplement (PMC6093909; doi:10.1038/s41598-018-30647-8), 2018-08-15
Supplement: 41598_2018_30647_MOESM1_ESM.pdf [file 41598_2018_30647_MOESM1_ESM.pdf]

1 Exploring scenarios of chikungunya mitigation with a data-driven agent-based  
2 model of the 2014-2016 outbreak in Colombia

3  
4  
5 Guido España<sup>1\*</sup>, John Grefenstette<sup>2</sup>, Alex Perkins<sup>1</sup>, Claudia Torres<sup>3</sup>, Alfonso Campo Carey<sup>4</sup>,  
6 Hernando Diaz<sup>3</sup>, Fernando de la Hoz<sup>5</sup>, Donald S. Burke<sup>6</sup>, and Willem G. van Panhuis<sup>6,7</sup>

7  
8 1. University of Notre Dame, Department of Biological Sciences and Eck Institute for Global  
9 Health, Notre Dame, IN, United States

10  
11 2. University of Pittsburgh, Department of Health Policy and Management, Pittsburgh, PA,  
12 United States

13  
14 3. Universidad Nacional de Colombia, Department of Electrical Engineering, Bogota, Colombia

15  
16 4. Colombia Instituto Nacional de Salud, Grupo de Gestión del Riesgo y Respuesta Inmediata,  
17 Bogota, Colombia

18  
19 5. Universidad Nacional de Colombia, Department of Public Health, Bogota, Colombia

20  
21 6. University of Pittsburgh, Department of Epidemiology, Pittsburgh, PA, United States

22  
23 7. University of Pittsburgh, Department of Biomedical Informatics, Pittsburgh, PA, United States

24  
25 \* Corresponding author: guido.espana@nd.edu

26  
27 **Supplement**

28  
29 Supplementary text

30  
31 1. Synthetic population

32  
33 **1.1. Data Sources**

34 Our agent-based model (ABM) used a “synthetic population” to represent a human population in its  
35 environment, based on real-world data. We used multiple datasets to create a synthetic population of  
36 Colombia for the year 2010: (1) a sample of the Colombia 2005 census collected by the Colombian  
37 National Administrative Department of Statistics, and available from the Integrated Public Use of  
38 Microdata Series, International (IPUMS-International) database<sup>1</sup>; (2) population counts, the number of  
39 students, and the number of people employed from the Colombian National Department of Statistics  
40 (DANE: Departamento Administrativo Nacional de Estadística)<sup>2</sup>; (3) the number of public schools,  
41 private schools, and universities by municipality from the Colombian National Ministry of Education<sup>3</sup>;  
42 (4) 2010 population density data at ~100 m<sup>2</sup> resolution from the WorldPop Americas project<sup>4</sup>; (5) land-  
43 use data at ~1 km<sup>2</sup> resolution from the Global Rural Urban Mapping Project (GRUMP)<sup>5</sup>; (6) temperature  
44 data from the WorldClim Project<sup>6</sup>; (7) geographic coordinates for buildings from the OpenStreetMap

45 project <sup>7</sup>; (8) administrative boundary data of the 1<sup>st</sup> administrative level (departments) and of  
46 municipalities from the Colombian Geographic Information System For National And Regional  
47 Comprehensive Land-Use Planning and Management Project<sup>8</sup>.

48

## 49 **1.2. Demographic characteristics of households and individuals**

50 We derived a population of “synthetic” humans with a marginal distribution of demographic  
51 characteristics that matched the real population, using various statistical algorithms. This synthetic  
52 population represented each of the 45,509,584 people in Colombia in 2010, distributed across 1,122  
53 municipalities and 33 departments. We assigned demographic characteristics to individuals (age, gender,  
54 school attendance, employment status) and households (size, head of household age, municipality,  
55 urban/rural location), using the Iterative Proportion Updating Algorithm<sup>9</sup> (IPU) to match these  
56 characteristics to the census data. The IPU algorithm matched demographic characteristics of the  
57 synthetic population to the real population at the household and municipality level by modifying the  
58 number of individuals with specified values for these characteristics. For example, it matched the age  
59 distribution of a synthetic municipality to a real municipality by iteratively modifying the number of  
60 synthetic people with certain ages. This process repeated iteratively until the error between the synthetic  
61 households and the data was below 1% or until 100 iterations were completed. After each iteration the  
62 IPU algorithm measured the goodness of fit using a  $\chi^2$  test comparing the distribution of each  
63 characteristic between the synthetic and real population. For 97% of synthetic municipalities, the age-  
64 structure was not statistically significantly different from that of the real population ( $p < 0.05$ ). The  
65 coefficient of determination ( $R^2$ ) between the proportion females, the number of students, and the number  
66 of employees in synthetic municipalities and their real-world equivalents was near 1.0 for each of these  
67 indicators. The overall age and gender distributions for the synthetic population of Colombia and the  
68 Census estimates for 2010 show an adequate approximation of the synthetic population in both gender  
69 and age (**Fig. S6**).

70

## 71 **1.3. Location of households**

72 The IPU algorithm assigned demographic characteristics to households and individuals but did not assign  
73 geographical locations. We created a “household locator” algorithm that assigned geographical locations  
74 to households according to data on population density and land-use. We created a 1 x 1 km grid across the  
75 country (789,116 grid cells that each contained at least one person). Then we assigned each household in  
76 a municipality (from the IPU algorithm) to a random grid cell in the urban area within the geographical  
77 boundaries of this municipality. As we placed households in grid cells, we ensured that the population  
78 density of each cell did not exceed the observed values. For each household within a grid cell, we  
79 randomly selected coordinates from available house coordinates in the OpenStreetMap dataset. If no  
80 house coordinates were available from OpenStreetMap to assign to a synthetic household, we assigned  
81 random coordinates within a 100-meter radius from a road within the grid cell. If a grid cell did not  
82 contain any roads, we assigned random coordinates from anywhere within a grid cell. For 30 out of 33  
83 departments the spatial correlation coefficient<sup>10</sup> between the population density of our synthetic  
84 population and the WorldPop data was >80% (**Fig. S7**). Population density in the remaining three  
85 departments was very low and did not match as well (these low-density areas did not contribute much to  
86 disease transmission).

87

## 88 **1.4. Location of schools and student assignment**

89 We also created an algorithm to assign geographic locations to schools. We used data from the Colombia  
90 Ministry of Education on the number of schools per municipality, school grade levels, and school sizes.  
91 For each school in a municipality, we randomly selected coordinates from available school coordinates in  
92 the OpenStreetMap dataset. If coordinates were not available for every school listed by the Ministry of  
93 Education, we randomly assigned the remaining schools to one of five 10 x 10 km grid cells that had the  
94 highest number of synthetic students and that were located within the municipality. We assigned random  
95 coordinates from within this grid cell to each school for which no coordinates were available in  
96 OpenStreetMap.

97

### 98 **1.5. Location of workplaces and employee assignment**

99 We also assigned geographical locations to workplaces. First, we created a list of synthetic workplaces  
100 with sizes according to the distribution of workplace size given by the 2005 Census. We created sufficient  
101 workplaces in each municipality to fit all employees. Workplaces were classified into small (1-50  
102 employees), medium (51-200 employees), or large (>200 employees) size. For each workplace in a  
103 municipality, we randomly selected coordinates from available workplace or school coordinates in the  
104 OpenStreetMap dataset (a school served as a workplace for teachers and staff). If coordinates were not  
105 available for every workplace, we randomly assigned the remaining workplaces to one of the five 1 x 1  
106 km grid cells that had the highest population density and that was located within a municipality. We  
107 assigned random coordinates from within these grid cells to each workplace for which no coordinates  
108 were available in OpenStreetMap.

109

## 110 **2. Mobility model**

111

### 112 **2.1. Students**

113 People designated to attend schools by the IPU algorithm were assigned to specific schools. Children 1-5  
114 years were assigned to a pre-school, 6-10 to a primary school, 11-17 to a secondary school, and 17+ to a  
115 university. We assigned students to a school within, or outside their municipality according to  
116 information about this assigned by the IPU algorithm. We randomly assigned students going to a school  
117 within their municipality to one of the five closest schools with availability for the student age and grade.  
118 For students going to a school outside their municipality, we randomly assigned them to one of the five  
119 closest schools in a neighboring municipality. This algorithm has been used previously to represent  
120 student mobility <sup>11</sup>. Students >17 years were assigned randomly to one of the five closest universities  
121 located within their department.

122

### 123 **2.2. Employees**

124 We assigned employees to workplaces based on commuting times assigned to them by the IPU algorithm,  
125 based on census data. The IPU algorithm also assigned employees to be working within or outside of their  
126 municipality, based on census data. For each employee working within her municipality, we used her  
127 commuting time to determine the distance to her workplace, assuming an average travel speed of 30  
128 km/hr. along Euclidean distance. We then drew a circle around her house with the commute distance as  
129 radius and randomly assigned the employee to one of five workplaces located within the municipality and  
130 closest to the circle. We assigned employees working outside of their municipality to a random workplace  
131 located anywhere outside of the municipality, but within their department.

132

### 133 **2.3. Inter-departmental mobility**

134 To enable travel between departments, we swapped the department of the school or workplace for 5% of  
135 students and employees that lived close to a department border. i.e., for each department, we randomly  
136 selected a 5% sample of all students and employees that lived within 10 km of a border. For each of these  
137 students and employees, we also randomly selected a “partner student or employee” from the neighboring  
138 department, also living within 10 km of the border. We then swapped the school or workplace between  
139 these partners.

140

## 141 **3. Mosquitos**

142

143 The spatial occurrence of mosquitoes was determined by their probability of occurrence computed from  
144 the largest database of *Aedes aegypti* occurrence compiled by Kraemer et al. with a 5km resolution <sup>12</sup>. For  
145 each location in the simulation region (household, school, or workplace) with a probability of occurrence  
146 higher than 0.8 <sup>13</sup>, we attached a mosquito population at a fixed ratio  $\rho$  of 1.02 pupae per human (**Fig. S7**)  
147 <sup>14</sup>. The duration of pupal development ( $\delta_T$ ) decreased exponentially with increasing temperature, in  
148 agreement with empirical observations <sup>15</sup>. This was implemented in our modeled as <sup>16</sup>:

149

$$150 \quad 29.97723 - 8.38467 * \log(\text{temperature}).$$

151

152 We assumed a proportion of female mosquitos ( $p_f$ ) of 0.5 <sup>16</sup> and a rate of successful emergence ( $\Delta_e$ ) of  
153 0.83 adults/day <sup>16</sup>. Adult mosquitos lived for a fixed number of 18 days ( $L_v$  <sup>17</sup>). Hence under equilibrium  
154 conditions, the number of adult, female mosquitos per human in each location was determined by:

155

$$156 \quad N_v = \rho \frac{p_f \times \Delta_e \times L_v}{\delta_T}.$$

157

158

## 159 **3. Agent-based simulation**

160

### 161 **3.1. Model overview**

162 To represent disease transmission in the Colombia synthetic population, we used the existing agent-based  
163 modeling platform developed by the University of Pittsburgh named Framework for Reconstructing  
164 Epidemiological Dynamics (FRED) <sup>18</sup>. FRED is an open-source, highly modular object-oriented platform  
165 for epidemic modeling. FRED is written in C++, is scalable, and is efficient for simulating epidemics in  
166 large populations. FRED was developed primarily to represent transmission of a respiratory disease such  
167 as influenza. In this representation, transmission occurs with a certain probability when human agents are  
168 in the same location (house, school, or workplace). We expanded FRED with a representation of  
169 mosquito-borne virus transmission. We assigned a mosquito population to each location, as described  
170 above. When a susceptible human agent appeared in a location with a mosquito population, an infected  
171 mosquito would transmit virus, with a specified probability, to the human host and vice-versa. The  
172 probability of transmission between mosquitos and humans also depended on the mosquito biting rate.

173

### 174 **3.2. Pathogen transmission**

175 We assumed an average mosquito biting rate  $b_v$  of 0.5/day/mosquito<sup>19,20</sup>. An infectious human could  
176 infect a mosquito, when visiting a location with mosquitos and when bitten, with an infection rate  $\beta_v$  of  
177 0.876/day (calibrated). We assumed that this infection rate is the same for symptomatic and asymptomatic  
178 individuals as other similar models have assumed<sup>21</sup>. Similarly, infectious mosquitos would infect  
179 susceptible humans who visited their location with an infection rate  $\beta_h$  of 0.196/day (calibrated) (**Fig. 1**).  
180 The probability of a human being bitten by an infectious mosquito in a location depended on the density  
181 of human hosts, the number of infectious mosquitos, and the average  $b_v$ . Infected mosquitos became  
182 infectious after the extrinsic incubation period of 11 days<sup>22</sup>. Humans became infectious after an average  
183 6-day latency period (lognormal distribution)<sup>22</sup> and remained infectious for an average 4.83-day  
184 infectious period (lognormal distribution)<sup>22</sup>. Only 7.2% of infected humans became symptomatic and  
185 were reported by the surveillance system (calibrated). This case detection rate  $\Gamma$  was composed of the  
186 probability of being symptomatic, the probability of a symptomatic case visiting a clinical care provider,  
187 and the probability of the provider to report this case to the surveillance system. Infectious humans  
188 contributed to transmission regardless of showing clinical symptoms. After infection, humans acquired  
189 lifelong immunity. Mosquitos remained infectious for the duration of their life, fixed at 18 days<sup>17</sup>. We  
190 simulated epidemics for a maximum duration of two years and could ignore human population dynamics,  
191 such as birth and death rates.

192

### 193 **3.3. Vector-control**

194 We represented different attributes of vector control using a set of vector-control-specific parameters  
195 (**Table S2**). Vector control influenced virus transmission by reducing the number of pupae at a location  
196 (household, school, or workplace) with an efficacy rate  $\epsilon_c$ . Based on the literature, we assumed a default  
197 efficacy of 80%<sup>23-25</sup>. Vector control activities were initiated by a municipality after the reported CHIKV  
198 incidence rate (IR) had exceeded an initiation threshold  $\psi_c$ . We determined an initiation threshold of  
199 20/100,000. Vector control by default continued for the duration of the epidemic. The proportion of  
200 neighborhoods in each municipality that participated in vector control activities increased with a  
201 neighborhood recruitment rate  $\lambda_c$  each day. We determined a  $\lambda_c$  of 7%/day. In each neighborhood, only  
202 a proportion of households participated according to the household participation rate  $\omega_c$ . We found a  
203 default  $\omega_c$  of 80% in the literature<sup>23-25</sup>. We modified each of these parameters for vector control when  
204 estimating the influence of each factor on the overall effectiveness of the intervention. We defined the  
205 effectiveness of vector control strategies as the percent pupae reduced at the municipality level.

206

### 207 **3.4. Model fitting to data**

208 Most of the model parameters were instantiated with values reported in the literature (**Table S1**). We used  
209 transmission parameters reported for DENV to represent CHIKV transmission ( $\xi_v, \xi_h, \gamma_h$ ) where  
210 necessary due to the absence of CHIKV-specific parameters at the time of study. We estimated the values  
211 for  $\beta_v, \beta_h$  and  $\Gamma_h$  by calibrating the model to real-world CHIKV case count data reported by the  
212 Colombia surveillance system (SIVIGILA). We used counts of total (suspected and confirmed) CHIKV  
213 infection as reported by this system. A suspected case of CHIKV was defined as the acute onset of fever  
214  $> 38^\circ\text{C}$  and severe arthralgia or arthritis not explained by other medical conditions, and residing or  
215 having visited epidemic or endemic areas within two weeks prior to the onset of clinical symptoms<sup>26</sup>. A  
216 laboratory confirmed case was defined as a suspected case with positive viral isolation or RT-PCR, or  
217 positive serology (IgM or a four-fold increase in CHIKV IgG)<sup>26</sup>.

218  
219 At the time of the study, CHIKV case count data were available from October 2014 to February 2015 (24  
220 weeks) and only for municipalities that had reported > 200 cases. At the end of the study, data for the  
221 entire epidemic became available and we used those data to test the model results. We calibrated model  
222 parameters to fit the first 24 weeks of the CHIKV epidemic in the city of Riohacha using a  $\chi^2$  goodness-  
223 of-fit measure. Riohacha was one of the first cities to report this outbreak. To find an optimal solution for  
224 the parameter values, i.e. values that resulted in the lowest  $\chi^2$  error of the overall model, we used a global  
225 approach to the Nelder-Mead simplex optimization algorithm<sup>27</sup>. We used this algorithm since it provides  
226 fast solutions without information about the derivatives of the system. The Nelder-Mead simplex method  
227 generates a simplex that represents different sets of values for the parameters, the total number of  
228 parameters is the number of dimensions,  $n$ . For  $n$  dimensions, a simplex is denoted by  $n+1$  vertices (e.g.  
229 in two dimensions, a simplex represents a triangle). In each iteration of the algorithm, the error between  
230 the model and the data is computed for each of the vertices, and the highest-error vertex is excluded and  
231 replaced. Vertex-replacement uses four operations: reflexion, expansion, contraction, and shrinking. The  
232 first three operations are computed in this order until a vertex with a lower error is found. If none is  
233 found, then the simplex shrinks and moves to the next iteration. This algorithm can lead to a locally  
234 optimal solution. We used multiple starting points to find a global solution. The parameters resulting from  
235 this fitting procedure to the Riohacha CHIKV epidemic led to simulated epidemic curves for the other  
236 municipalities that also fitted their observed data (**Fig. S1**). We instantiated two vector-control parameters  
237 with values reported in the literature: the efficacy rate  $\epsilon_c$  and the household participation rate  $\omega_c$ <sup>23-25</sup>. We  
238 used the duration of the epidemic as the default duration for vector control and adjusted the neighborhood  
239 recruitment rate  $\psi_c$  and the initiation threshold  $\lambda_c$  to exploratory values.

### 240 241 **3.5 Sensitivity analysis**

242 We conducted a sensitivity analysis to better understand how the number of pupae per person ( $\rho$ , default  
243 1.02) and temperatures affected the simulated CHIKV epidemic curve. We simulated the CHIKV  
244 epidemic for the cities of Santa Marta and Riohacha, for scenarios with and without vector control  
245 intervention, while ranging the pupae per person from 50% to 150% of the default value in 10%  
246 increments. We conducted 20 simulations for each scenario and reported the average epidemic curve for  
247 each scenario (**Fig. S3**). Similarly, we simulated the epidemic using each of the monthly temperature  
248 grids instead of the average annual temperature. Monthly temperatures varied from 95% to 103% of the  
249 default average annual value. We also conducted 20 simulations for each temperature scenario and  
250 reported the average curve for each (**Fig. S4**).

### 251 252 **3.6. Model testing**

253  
254 At the end of our study, additional data on the CHIKV epidemic became available. We used CHIKV case  
255 counts reported until week three of 2016 to test the model fit for the entire epidemic period. We compared  
256 the aggregate simulated case counts for each of the six regions in Colombia with the observed data and  
257 found a good fit for every region except Caribe and Insular (**Fig. 4**): even the model with vector control in  
258 all municipalities overestimated the epidemic peak in these regions. We suspect that the case detection  
259 rate in Caribe may have decreased during the epidemic and that the particular spatial pattern of the island  
260 communities caused the erratic epidemic pattern observed in Insular.

261

262 **References**

- 263 1. University of Minnesota. Minnesota Population Center. Integrated Public Use Microdata Series,  
264 International: Version 6.4 [Machine-readable database]. (2015).
- 265 2. Departamento Administrativo Nacional de Estadística. *Censo General 2005*. (2005).
- 266 3. Sistema de Información Nacional de Educación Básica y Media. Buscando Colegio. (2015).  
267 Available at: <http://sineb.mineducacion.gov.co/bcol/app>. (Accessed: 1st January 2014)
- 268 4. Sorichetta, A. *et al.* High-resolution gridded population datasets for Latin America and the  
269 Caribbean in 2010, 2015, and 2020. *Sci. data* **2**, 150045 (2015).
- 270 5. University, C. for I. E. S. I. N.-C.-C., IFPRI, I. F. P. R. I.-, Bank, T. W. & CIAT, C. I. de A. T.-.  
271 Global Rural-Urban Mapping Project, Version 1 (GRUMPv1): Urban Extents Grid. (2011).
- 272 6. Hijmans, R. J., Cameron, S. E., Parra, J. L., Jones, P. G. & Jarvis, A. Very high resolution  
273 interpolated climate surfaces for global land areas. *Int. J. Climatol.* **25**, 1965–1978 (2005).
- 274 7. OpenStreetMap Foundation. OpenStreetMap.
- 275 8. Infraestructura Colombiana De Datos Especiales. Sistema Información Geográfica Para La  
276 Planeción Y El Ordenamiento Territorial.
- 277 9. Ye, X., Konduri, K., Pendyala, R. M., Sana, B. & Waddell, P. A methodology to match  
278 distributions of both household and person attributes in the generation of synthetic populations. in  
279 *88th Annual Meeting of the Transportation Research Board, Washington, DC* (2009).
- 280 10. Sabesan, A. *et al.* Metrics for the comparative analysis of geospatial datasets with applications to  
281 high-resolution grid-based population data. *GeoJournal* **69**, 81–91 (2007).
- 282 11. Cajka, J. C., Cooley, P. C. & Wheaton, W. D. Attribute assignment to a synthetic population in  
283 support of agent-based disease modeling. *Methods Rep. RTI. Press.* **19**, 1 (2010).
- 284 12. Kraemer, M. U. *et al.* The global distribution of the arbovirus vectors *Aedes aegypti* and *Ae.*  
285 *albopictus*. *Elife* **4**, e08347 (2015).
- 286 13. Siraj, A. S. *et al.* Temperature modulates dengue virus epidemic growth rates through its effects on  
287 reproduction numbers and generation intervals. *PLoS Negl. Trop. Dis.* **11**, 1–19 (2017).
- 288 14. Padmanabha, H., Durham, D., Correa, F., Diuk-Wasser, M. & Galvani, A. The interactive roles of  
289 *Aedes aegypti* super-production and human density in dengue transmission. *PLoS Negl. Trop. Dis.*  
290 **6**, e1799 (2012).
- 291 15. Rueda, L. M., Patel, K. J., Axtell, R. C. & Stinner, R. E. Temperature-dependent development and  
292 survival rates of *Culex quinquefasciatus* and *Aedes aegypti* (Diptera: Culicidae). *J. Med. Entomol.*  
293 **27**, 892–898 (1990).
- 294 16. Focks, D. A., Brenner, R. J., Hayes, J. & Daniels, E. Transmission thresholds for dengue in terms  
295 of *Aedes aegypti* pupae per person with discussion of their utility in source reduction efforts. *Am.*  
296 *J. Trop. Med. Hyg.* **62**, 11–18 (2000).
- 297 17. Chao, D. L., Halstead, S. B., Halloran, M. E. & Longini Jr, I. M. Controlling dengue with vaccines  
298 in Thailand. *PLoS Negl. Trop. Dis.* **6**, e1876 (2012).
- 299 18. Grefenstette, J. J. *et al.* FRED (a Framework for Reconstructing Epidemic Dynamics): an open-  
300 source software system for modeling infectious diseases and control strategies using census-based  
301 populations. *BMC Public Health* **13**, 940 (2013).
- 302 19. Manore, C. A., Hickmann, K. S., Xu, S., Wearing, H. J. & Hyman, J. M. Comparing dengue and  
303 chikungunya emergence and endemic transmission in *A. aegypti* and *A. albopictus*. *J. Theor. Biol.*  
304 **356**, 174–191 (2014).
- 305 20. Robinson, M. *et al.* A model for a chikungunya outbreak in a rural Cambodian setting:  
306 implications for disease control in uninfected areas. *PLoS Negl. Trop. Dis.* **8**, e3120 (2014).
- 307 21. Dommar, C. J., Lowe, R., Robinson, M. & Rodó, X. An agent-based model driven by tropical  
308 rainfall to understand the spatio-temporal heterogeneity of a chikungunya outbreak. *Acta Trop.*  
309 **129**, 61–73 (2014).
- 310 22. Nishiura, H. & Halstead, S. B. Natural history of dengue virus (DENV)-1 and DENV-4 infections:  
311 reanalysis of classic studies. *J. Infect. Dis.* **195**, 1007–13 (2007).

- 312 23. Quintero, J. *et al.* Effectiveness and feasibility of long-lasting insecticide-treated curtains and  
313 water container covers for dengue vector control in Colombia: A cluster randomised trial. *Trans.*  
314 *R. Soc. Trop. Med. Hyg.* **109**, 116–125 (2014).
- 315 24. Ocampo, C. B. *et al.* Evaluation of community-based strategies for *Aedes aegypti* control inside  
316 houses. *Biomedica* **29**, 282–97 (2009).
- 317 25. Karunaratne, S. H. P. P., Weeraratne, T. C., Perera, M. D. B. & Surendran, S. N. Insecticide  
318 resistance and, efficacy of space spraying and larviciding in the control of dengue vectors *Aedes*  
319 *aegypti* and *Aedes albopictus* in Sri Lanka. *Pestic. Biochem. Physiol.* **107**, 98–105 (2013).
- 320 26. Instituto Nacional de Salud de Colombia (INS). *Protocolo de Vigilancia en Salud Pública.*  
321 (2016).
- 322 27. Nelder, J. A. & Mead, R. A simplex method for function minimization. *Comput. J.* **7**, 308–313  
323 (1965).
- 324 28. Chao, D. L. *et al.* Controlling Dengue with Vaccines in Thailand. *PLoS Negl. Trop. Dis.* **6**, e1876  
325 (2012).
- 326 29. Padmanabha, H., Durham, D., Correa, F., Diuk-Wasser, M. & Galvani, A. The Interactive Roles of  
327 *Aedes aegypti* Super-Production and Human Density in Dengue Transmission. *PLoS Negl. Trop.*  
328 *Dis.* **6**, e1799 (2012).



329 Supplementary Figures

330

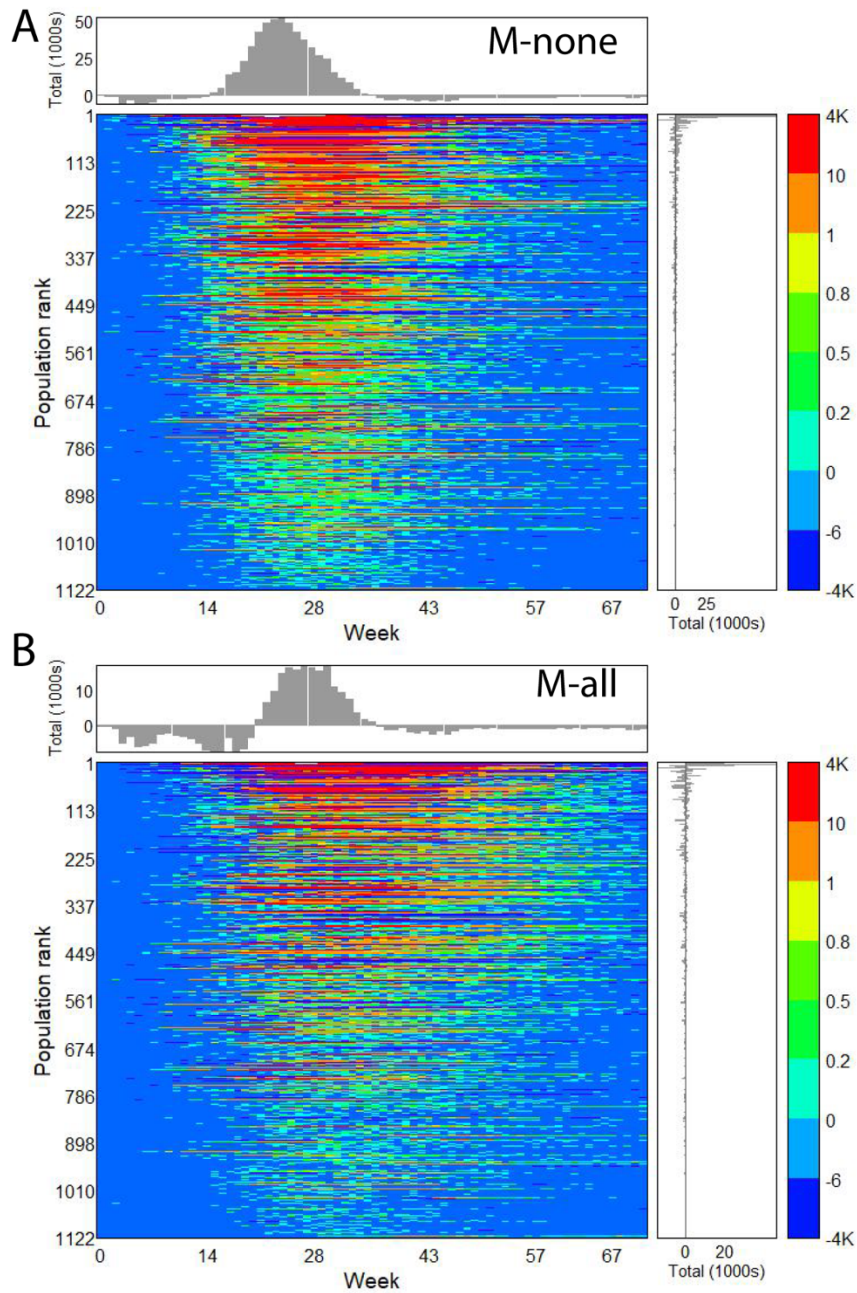

331

332

333

334

335

336

337

**Figure S1. Difference between simulated and observed cases per municipality.** Municipalities are ranked by their population count (largest population at the top). The top panel displays the total difference per week and the panel on the right displays the total difference per municipality. We compared observed case counts with simulated case counts for the scenario (A) without any vector control (M-none), and (B) with vector control in all municipalities (M-all).

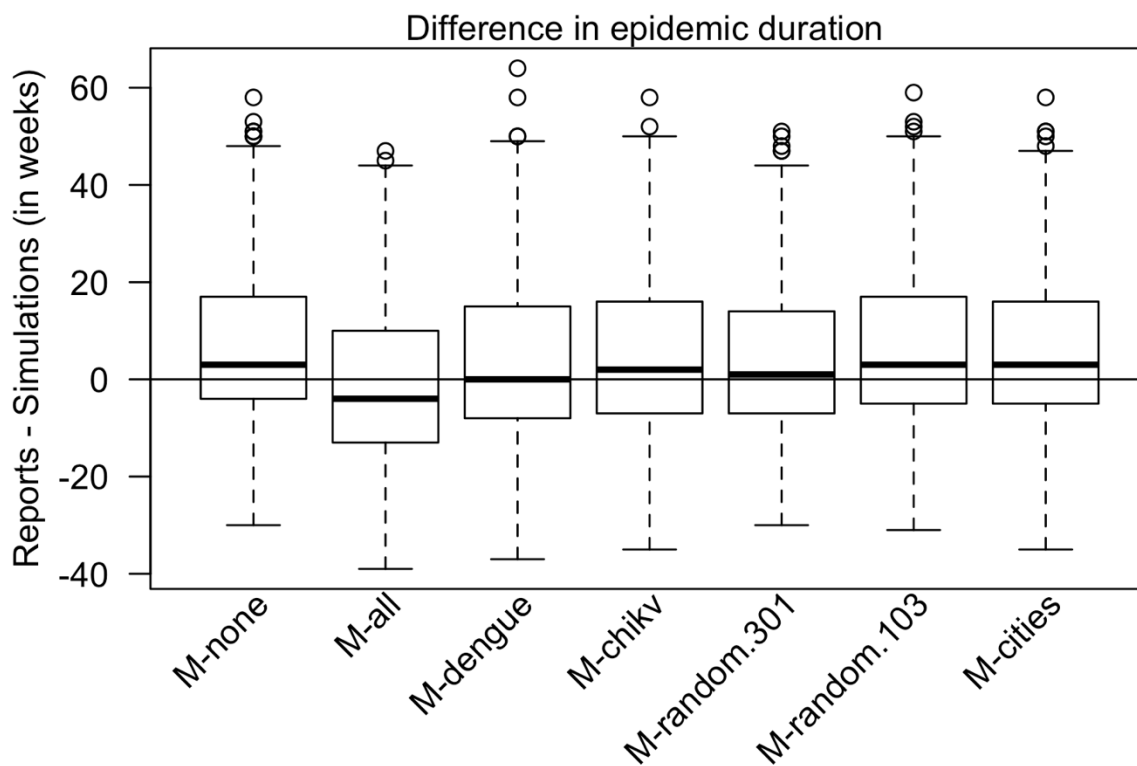

338  
 339 **Figure S2. Model outcomes compared to reports in terms of epidemic duration.** Each box plot  
 340 represents the distribution of the difference between the epidemic duration of the reports and the  
 341 simulations for each municipality with at least 10 cases reported. The duration of the epidemic was  
 342 measured in weeks as the number of weeks between 5 and 95%.  
 343  
 344  
 345  
 346

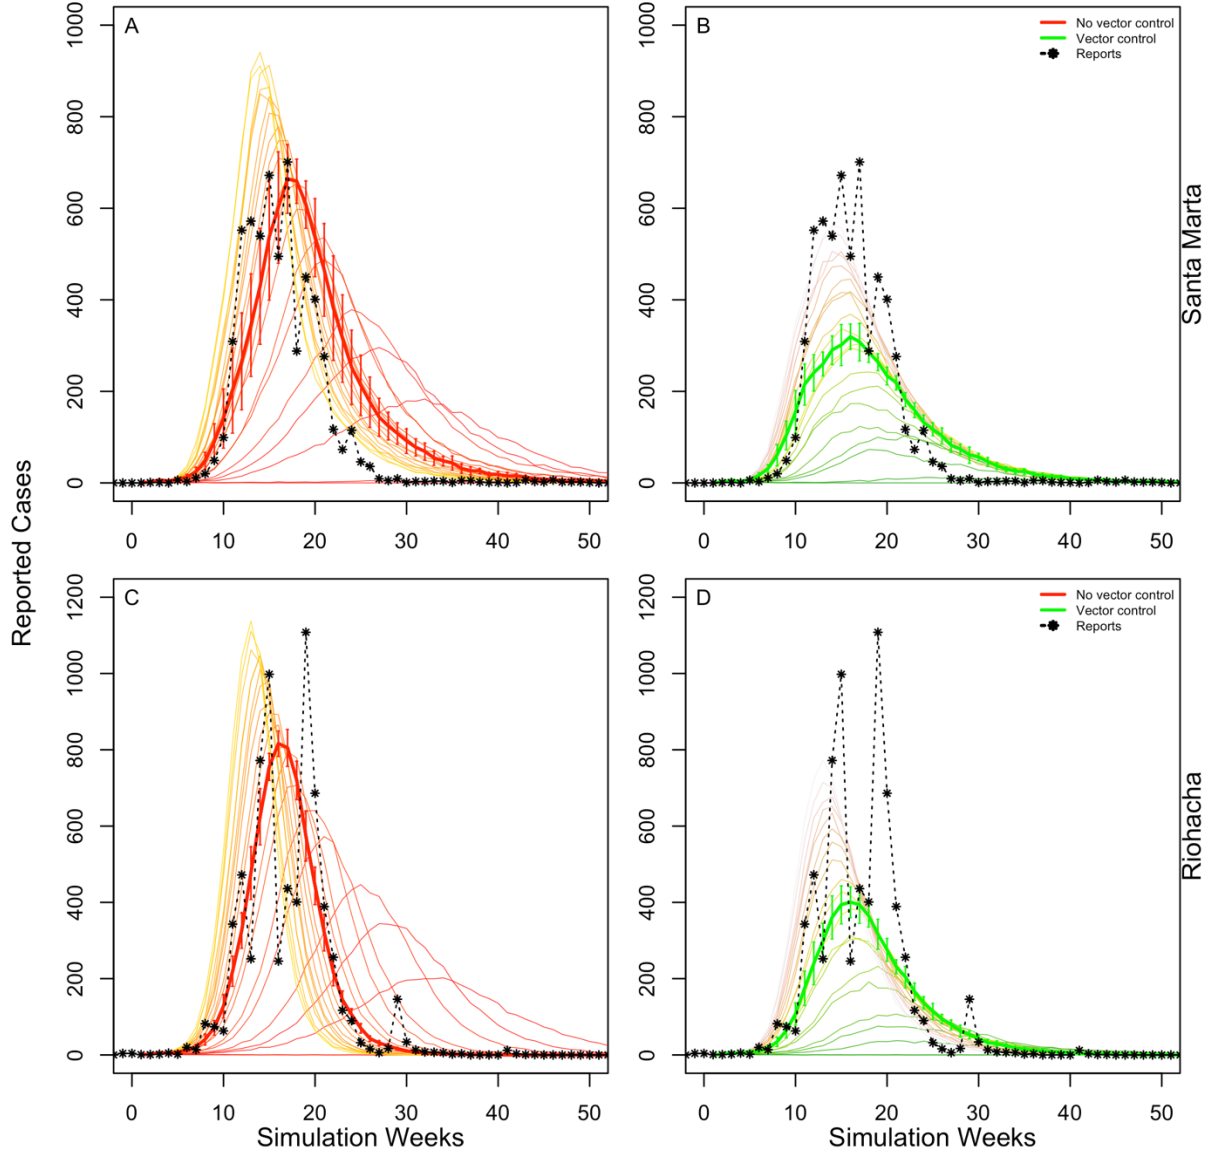

347  
 348 **Figure S3. Epidemic curves resulting from sensitivity analysis of pupae per person.** Simulated and  
 349 reported number of cases for scenarios without vector control while varying the number of pupae per  
 350 person from 50% to 150% of the default value of 1.02, with darker color curves corresponding to higher  
 351 pupae and lighter color curves to lower pupae per person. The top panels show the simulations for Santa  
 352 Marta without vector control (A) and with vector control interventions in place (B). The bottom panels  
 353 show the simulations for Riohacha with vector control (C) and without vector control interventions in  
 354 place (D).

355  
 356  
 357  
 358

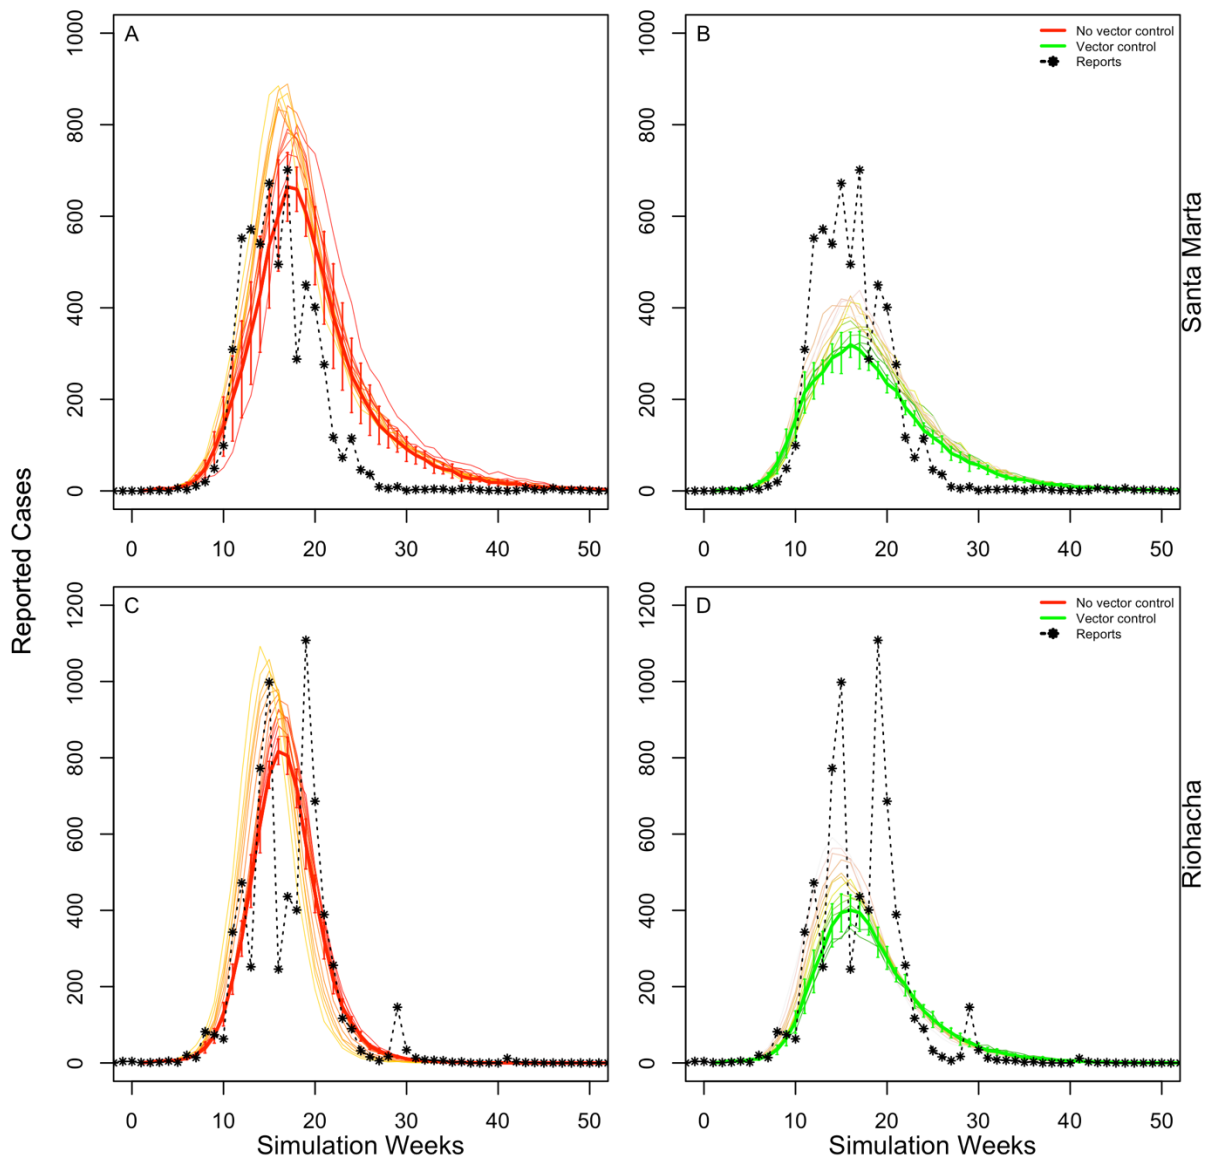

359  
 360 **Figure S4. Epidemic curves resulting from sensitivity analysis of temperature.** Simulated and  
 361 reported number of cases for scenarios without vector control while varying temperatures according to  
 362 those reported for each month of the year instead of the average annual temperature, resulting in average  
 363 temperatures ranging from 95% to 103% of the average annual temperature value, with darker color  
 364 curves corresponding to higher temperatures and lighter color curves to lower temperatures. The top  
 365 panels show the simulations for Santa Marta without vector control (A) and with vector control  
 366 interventions in place (B). The bottom panels show the simulations for Riohacha with vector control (C)  
 367 and without vector control interventions in place (D).  
 368

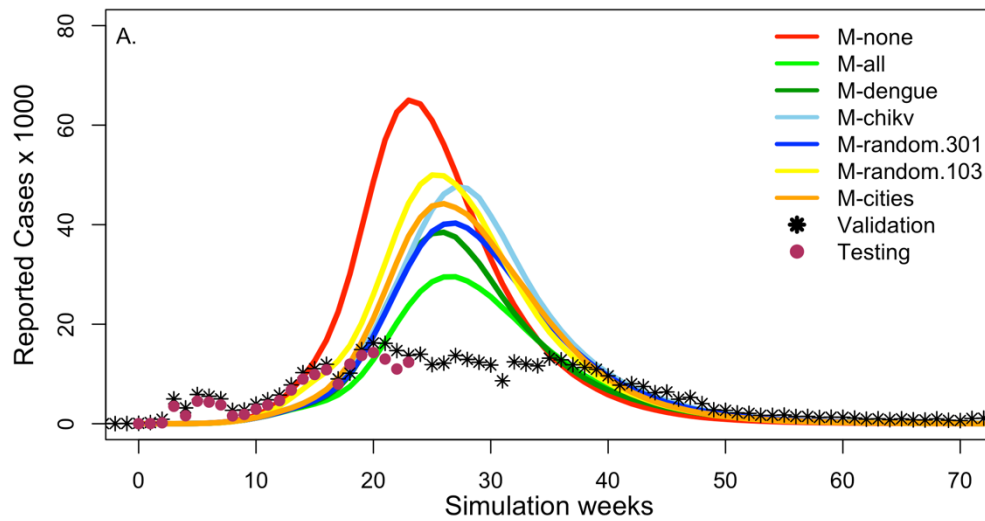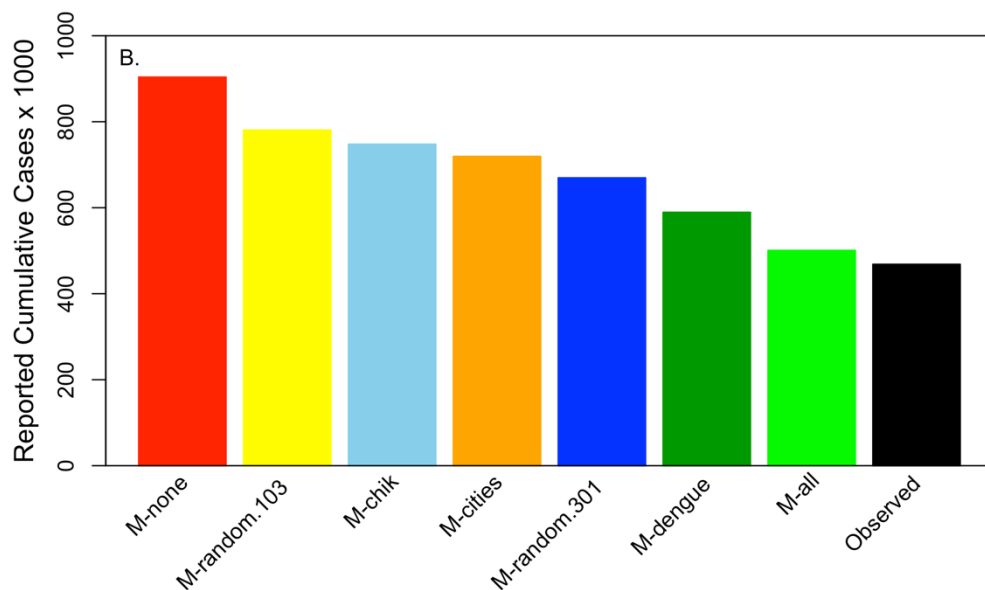

369  
 370 **Figure S5. Effect of vector control on nationwide CHIKV case counts.** We simulated epidemic  
 371 scenarios with seven different strategies for spatial targeting of vector control across the country: 1) all  
 372 municipalities (M-all); 2) no vector control (M-none); 3) 103 municipalities that had reported  
 373 chikungunya (M-chikv); 4) 103 randomly selected municipalities (M-random.103); 5) 301 municipalities  
 374 that had reported dengue previously (M-dengue); 6) 301 randomly selected municipalities (M-  
 375 random.301); and 7) 27 major cities (M-cities); (A) Observed case counts (during the calibration and  
 376 testing period) and case counts resulting from simulation (averages of 8 runs per scenario); (B) Observed  
 377 cumulative case counts (black) and simulated counts for each of the seven strategies over the course of  
 378 the 70 week epidemic.  
 379

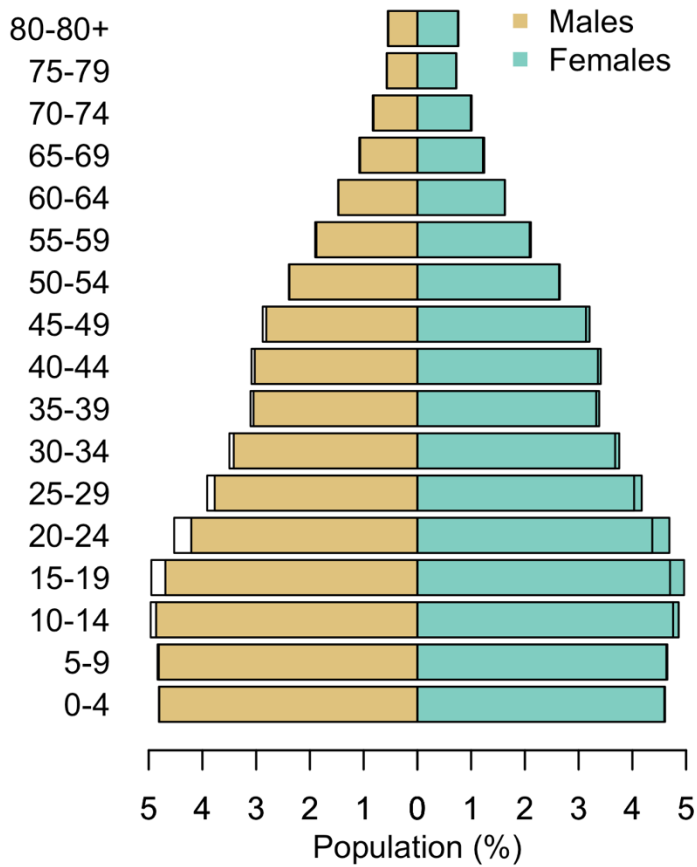

380  
 381 **Figure S6. Age and gender distributions from the Census and the synthetic population of Colombia.**  
 382 The colored bars represent the synthetic population, while the empty bars represent the Census estimates  
 383 for 2010.  
 384

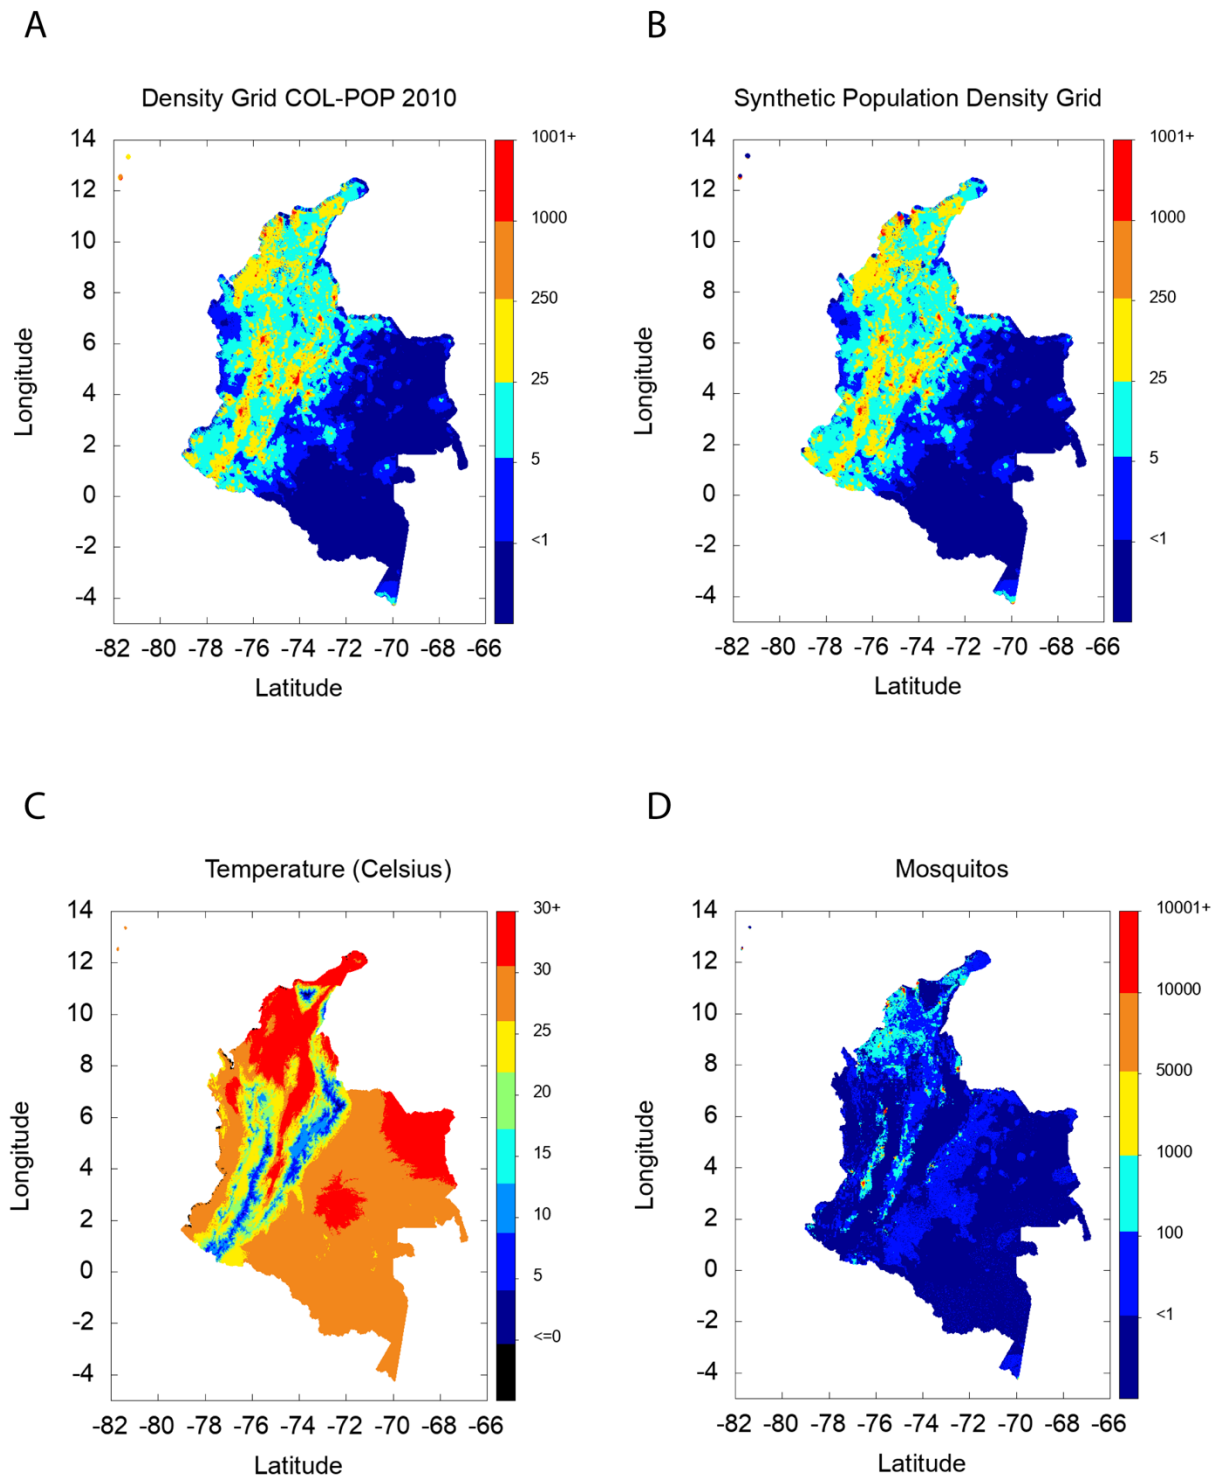

386

387

388 **Figure S7. Synthetic population compared to observed human density and temperature data. (A)**389 Population density per 1x1 km grid cell estimated by the WorldPop project; **(B)** population density in our390 synthetic population; **(C)** temperature per 1x1 km grid cell from the WorldClim database; and **(D)**

391 synthetic population mosquito density per 1x1 km grid cell. Maps were created using gnuplot 5

392 (<http://www.gnuplot.info>).

393  
394  
395  
396  
397  
398  
399

Supplemental Tables.

Table S1. Disease transmission parameters

| Parameter                          | Symbol      | Value                                   | Source                                                                  |
|------------------------------------|-------------|-----------------------------------------|-------------------------------------------------------------------------|
| Extrinsic incubation period        | $\xi_v$     | 1/11                                    | Nishiura H., et. al., 2007 <sup>22</sup>                                |
| Average mosquito biting rate       | $b_v$       | 0.5                                     | Manore et al., 2014 <sup>19</sup> , Robinson et al., 2014 <sup>20</sup> |
| Mosquito birth and death rate      | $\mu_v$     | 1/18                                    | Chao D.L., et. al., 2012 <sup>28</sup>                                  |
| Mosquito adult emergence rate      | $\Lambda_p$ | 0.83                                    | Focks D., et. al., 2000 <sup>16</sup>                                   |
| Mosquito female ratio              | $\zeta_v$   | 0.5                                     | Focks D., et. al., 2000 <sup>16</sup>                                   |
| Duration of pupal development      | $\delta_T$  | 29.98 – (8.38*<br>log(T <sup>†</sup> )) | Focks D., et. al., 2000 <sup>16</sup>                                   |
| Female adult mosquito per location | $N_v$       | See equation in methods                 | Focks D., et. al., 2000 <sup>16</sup>                                   |
| Pupae per person index             | $\rho$      | 1.02                                    | Padmanabha H., et. al., 2012 <sup>29</sup>                              |
| Latency period                     | $\xi_h$     | 6 (sd <sup>‡</sup> 1.4)                 | Nishiura H., et. al., 2007 <sup>22</sup>                                |
| Infectious period                  | $\gamma_h$  | 4.83 (sd <sup>‡</sup> 1.2)              | Nishiura H., et. al., 2007 <sup>22</sup>                                |
| Case detection rate                | $\Gamma_h$  | 0.072                                   | Calibrated (Riohacha)                                                   |
| Mosquito infection probability     | $\beta_v$   | 0.876                                   | Calibrated (Riohacha)                                                   |
| Human infection probability        | $\beta_h$   | 0.196                                   | Calibrated (Riohacha)                                                   |

400 † Temperature  
401 ‡ Standard deviation of a lognormal distribution  
402

Table S2. Vector control parameters

| Parameter                     | Symbol       | Value | Source                                                                                                       |
|-------------------------------|--------------|-------|--------------------------------------------------------------------------------------------------------------|
| Initiation threshold          | $\psi_c$     | 20    | Hypothetical                                                                                                 |
| Neighborhood recruitment rate | $\lambda_c$  | 7%    | Hypothetical                                                                                                 |
| Location participation rate   | $\omega_c$   | 0.8   | Quintero J., et. al., 2014, Ocampo C.B., et. al., 2009, Karunaratne S.H.P.P., et. al., 2013 <sup>23-25</sup> |
| Efficacy                      | $\epsilon_c$ | 0.8   | Quintero J., et. al., 2014, Ocampo C.B., et. al., 2009, Karunaratne S.H.P.P., et. al., 2013 <sup>23-25</sup> |
| Duration                      | $T_c$        | 700   | Decided by authors                                                                                           |

404



405 Table S3. Nationwide impact of spatial targeting strategies for vector control

| Strategy          | Mun* | Participants | Cases reported | Cases prevented (%) | Cases prevented per 1000† |
|-------------------|------|--------------|----------------|---------------------|---------------------------|
| M-none            | 0    | 0            | 903,924        | 0 (0)               | 0.00                      |
| M-all             | 521  | 24,061,178   | 500,984        | 402,940 (44.6)      | 16.7                      |
| M-dengue          | 301  | 17,469,686   | 589,487        | 314,437 (34.8)      | 17.9                      |
| M-random301       | 301  | 12,616,411   | 669,671        | 234,253 (25.9)      | 18.6                      |
| M-chikv           | 103  | 8,489,214    | 747,926        | 155,998 (17.3)      | 18.3                      |
| M-random103       | 103  | 7,326,132    | 780,791        | 123,133 (13.6)      | 16.8                      |
| M-cities          | 27   | 9,485,976    | 719,524        | 184,400 (20.4)      | 19.4                      |
| <b>Observed**</b> | -    | -            | <b>468,564</b> | -                   | -                         |

406 \* Number of municipalities with vector-control

407 \*\* Cases reported between 2014 week 22 and 2016 week 11

408 † Cases prevented per 1000 people participating in vector control activities

409

410

411

412 Supplemental Videos.

413

414 **Video S1: Spatial progression of the CHIKV epidemic in Colombia with three scenarios: vector**  
 415 **control in all municipalities, vector control in municipalities that previously reported DENV, and**  
 416 **no vector control.** Household locations of infected (red) and recovered (green) cases on days 125, 250,  
 417 350, and 500 of the epidemic. Altitude per 1x1 km grid cells in grey. This video was generated using R  
 418 v.3.2.3 (<https://www.r-project.org>).

419
